# Supplementary material
Source: MDPI journal article supplement (https://www.mdpi.com/2624-862X/3/3/38)
Supplement: s1 [file s1]

## Supplementary Materials

### Seasonal variations of milk composition of Sarda and Saanen dairy goats

**Table S1.** Two-Way ANOVA effects of different variables (year, month, farm) and their interactions on mean differences of the milk main components (fat, protein, lactose, and urea, as reported in Table 1) for Sarda and Saanen milk samples.

|                      | Year | Month | Farm | Year x Month | Year x Farm   | Month x Farm |
|----------------------|------|-------|------|--------------|---------------|--------------|
| <i><b>Sarda</b></i>  |      |       |      |              |               |              |
| Fat                  | **   | ***   | ***  | ***          | ***           | ***          |
| Protein              | **   | ***   | ***  | ***          | ***           | ***          |
| Lactose              | ***  | ***   | ***  | ***          | ***           | ***          |
| Urea                 | NS   | ***   | ***  | ***          | ***           | ***          |
| <i><b>Saanen</b></i> |      |       |      |              |               |              |
| Fat                  | NS   | ***   | ***  | ***          | ***           | ***          |
| Protein              | NS   | ***   | ***  | ***          | ***           | ***          |
| Lactose              | ***  | ***   | ***  | ***          | ***           | ***          |
| Urea                 | **   | ***   | ***  | ***          | ***           | ***          |
| <i><b>Breed</b></i>  |      |       |      | Breed x Year | Breed x Month |              |
| Fat                  |      |       |      | NS           | ***           |              |
| Protein              |      |       |      | NS           | ***           |              |
| Lactose              |      |       |      | **           | ***           |              |
| Urea                 |      |       |      | NS           | ***           |              |

\*\*p < 0.01; \*\*\* p< 0.001; NS = not significant, p> 0.05.
